# Supplementary material for: Halide exchange mediated cation exchange facilitates room temperature co-doping of d-and f-block elements in cesium lead halide perovskite nanoparticles
Source: Royal Society of Chemistry journal article supplement (doi:10.1039/d4nr00805g), 2024-01-01
Supplement: d4nr00805g1.pdf [file d4nr00805g1.pdf]

## Electronic Supplementary Information

### **Halide Exchange Mediated Cation Exchange Facilitates Room Temperature Co-doping of d- and f-Block Elements in Cesium Lead Halide Perovskite Nanoparticles**

Jomy Jose Philip,<sup>1</sup> Gouranga H. Debnath<sup>1\*</sup> David H. Waldeck,<sup>2,3\*</sup> and R. Geetha Balakrishna,<sup>1\*</sup>

<sup>1</sup>Centre for Nano and Material Sciences, Jain University, Bangalore, Karnataka 562112, India

<sup>2</sup>Department of Chemistry, University of Pittsburgh, Pittsburgh, Pennsylvania 15260, USA

<sup>3</sup>Petersen Institute of NanoScience and Engineering, University of Pittsburgh,  
Pittsburgh, Pennsylvania 15261, USA

E-mail: gouranga.debnath@jainuniversity.ac.in, gouranga0430@gmail.com (Gouranga H.  
Debnath)

dave@pitt.edu (David H. Waldeck)

br.geetha@jainuniversity.ac.in (R. Geetha Balakrishna)

\*To whom the correspondence should be addressed

## Table of Contents

|                                                                                                                                                                                                                                                                                                                                                                                                                                                                                                                                                                                                                                                                                                                                                                         |     |
|-------------------------------------------------------------------------------------------------------------------------------------------------------------------------------------------------------------------------------------------------------------------------------------------------------------------------------------------------------------------------------------------------------------------------------------------------------------------------------------------------------------------------------------------------------------------------------------------------------------------------------------------------------------------------------------------------------------------------------------------------------------------------|-----|
| <b>Figure S1.</b> TEM images of (a) CsPbBr <sub>3</sub> NPs and (b) CsPbBr <sub>3</sub> /MnCl <sub>2</sub> YbCl <sub>3</sub> NPs are shown along with their size distributions (inset). .....                                                                                                                                                                                                                                                                                                                                                                                                                                                                                                                                                                           | 3   |
| <b>Figure S2.</b> A comparison of the (a) Mn 2p XPS signatures between MnCl <sub>2</sub> salt (black circles) and CsPbBr <sub>3</sub> /MnCl <sub>2</sub> YbCl <sub>3</sub> NPs (orange circles), (b) Yb 4d XPS signatures between YbCl <sub>3</sub> salt (black circles) and CsPbBr <sub>3</sub> /MnCl <sub>2</sub> YbCl <sub>3</sub> NPs (fitted with purple solid line) and Br 3d XPS between CsPbBr <sub>3</sub> NPs and CsPbBr <sub>3</sub> /MnCl <sub>2</sub> YbCl <sub>3</sub> NPs are shown. The dotted lines in panels a-c indicate the shift in the binding energies between the different systems. The black solid lines denote the baseline. In panel b, the spectrum is shown in black circles and the envelope of the fit is shown in red solid line. .... | 3   |
| <b>Figure S3.</b> EDS signatures of (a) CsPbBr <sub>3</sub> NPs and (b) CsPbBr <sub>3</sub> /MnCl <sub>2</sub> YbCl <sub>3</sub> NPs are shown. ....                                                                                                                                                                                                                                                                                                                                                                                                                                                                                                                                                                                                                    | 4   |
| <b>Figure S4.</b> Emission decay profiles of CsPbBr <sub>3</sub> NPs (green) and CsPbBr <sub>3</sub> /MnCl <sub>2</sub> YbCl <sub>3</sub> NPs (blue) are shown. The NPs were dispersed in toluene for acquiring the spectra. ....                                                                                                                                                                                                                                                                                                                                                                                                                                                                                                                                       | 5   |
| <b>Figure S5.</b> Mn <sup>2+</sup> (left) and Yb <sup>3+</sup> (right) emission decay profiles in CsPbBr <sub>3</sub> /MnCl <sub>2</sub> YbCl <sub>3</sub> NPs are shown. The NPs were dispersed in toluene for acquiring the spectrum.....                                                                                                                                                                                                                                                                                                                                                                                                                                                                                                                             | 6   |
| <b>Figure S6.</b> TEM images of (a) CsPbCl <sub>3</sub> NPs and (b) CsPbCl <sub>3</sub> /MnCl <sub>2</sub> YbCl <sub>3</sub> NPs are shown along with their size distributions (inset). ....                                                                                                                                                                                                                                                                                                                                                                                                                                                                                                                                                                            | 7   |
| <b>Figure S7.</b> A comparison of the (a) Mn 2p XPS signatures between MnCl <sub>2</sub> salt (black circles) and CsPbCl <sub>3</sub> /MnCl <sub>2</sub> YbCl <sub>3</sub> NPs (orange circles) and (b) Yb 4d XPS signatures between YbCl <sub>3</sub> salt (black circles) and CsPbCl <sub>3</sub> /MnCl <sub>2</sub> YbCl <sub>3</sub> NPs (fitted with purple solid line) are shown. The dotted lines in panels a-b indicate the shift in the binding energies between the precursors and the NPs. The black solid lines denote the baseline. In panel b, the spectrum is shown in black circles and the envelope of the fit is shown in red solid line. ....                                                                                                        | 7   |
| <b>Figure S8.</b> EDS signatures of (a) CsPbCl <sub>3</sub> NPs and (b) CsPbCl <sub>3</sub> /MnCl <sub>2</sub> YbCl <sub>3</sub> NPs are shown.....                                                                                                                                                                                                                                                                                                                                                                                                                                                                                                                                                                                                                     | 8   |
| <b>Figure S9.</b> Emission decay profiles of CsPbCl <sub>3</sub> NPs (magenta) and CsPbCl <sub>3</sub> /MnCl <sub>2</sub> YbCl <sub>3</sub> NPs (blue) are shown. The NPs were dispersed in toluene for acquiring the spectra. ....                                                                                                                                                                                                                                                                                                                                                                                                                                                                                                                                     | 9   |
| <b>Figure S10.</b> Mn <sup>2+</sup> (left) and Yb <sup>3+</sup> (right) emission decay profile in CsPbCl <sub>3</sub> /MnCl <sub>2</sub> YbCl <sub>3</sub> NPs are shown. The NPs were dispersed in toluene for acquiring the spectrum.....                                                                                                                                                                                                                                                                                                                                                                                                                                                                                                                             | 9   |
| <b>Figure S11.</b> XRD patterns of the CsPbCl <sub>3</sub> and the CsPbCl <sub>3</sub> /EuCl <sub>3</sub> TbCl <sub>3</sub> NPs are shown. ....                                                                                                                                                                                                                                                                                                                                                                                                                                                                                                                                                                                                                         | 10  |
| <b>Figure S12.</b> EDS signature of CsPbCl <sub>3</sub> /EuCl <sub>3</sub> TbCl <sub>3</sub> NPs is shown. ....                                                                                                                                                                                                                                                                                                                                                                                                                                                                                                                                                                                                                                                         | 10  |
| <b>Figure S13.</b> UV-vis absorption and steady-state emission spectra of CsPbCl <sub>3</sub> /EuCl <sub>3</sub> TbCl <sub>3</sub> NPs are shown. ....                                                                                                                                                                                                                                                                                                                                                                                                                                                                                                                                                                                                                  | 11  |
| <b>Figure S14.</b> Eu <sup>3+</sup> and Tb <sup>3+</sup> decay profiles in EuCl <sub>3</sub> TbCl <sub>3</sub> NPs are shown. ....                                                                                                                                                                                                                                                                                                                                                                                                                                                                                                                                                                                                                                      | 12  |
| <b>Figure S15.</b> Excitation spectra of the LnCl <sub>3</sub> .6H <sub>2</sub> O [Ln = Eu, Tb] in water is shown. For EuCl <sub>3</sub> .6H <sub>2</sub> O, the spectrum from 300-330 nm is broken to remove the contribution of the harmonic from the excitation source. ....                                                                                                                                                                                                                                                                                                                                                                                                                                                                                         | 13  |
| <b>Table S1.</b> Atomic percentages of the different elements are shown.....                                                                                                                                                                                                                                                                                                                                                                                                                                                                                                                                                                                                                                                                                            | S4  |
| <b>Table S2.</b> Lifetime parameters of the different NPs. <sup>1</sup> .....                                                                                                                                                                                                                                                                                                                                                                                                                                                                                                                                                                                                                                                                                           | S5  |
| <b>Table S3.</b> Mn <sup>2+</sup> and Yb <sup>3+</sup> lifetime parameters of the different NPs. <sup>1</sup> .....                                                                                                                                                                                                                                                                                                                                                                                                                                                                                                                                                                                                                                                     | S6  |
| <b>Table S4.</b> Ln <sup>3+</sup> (Ln = Eu, Tb) lifetime parameters of the different NPs. <sup>1</sup> .....                                                                                                                                                                                                                                                                                                                                                                                                                                                                                                                                                                                                                                                            | S12 |

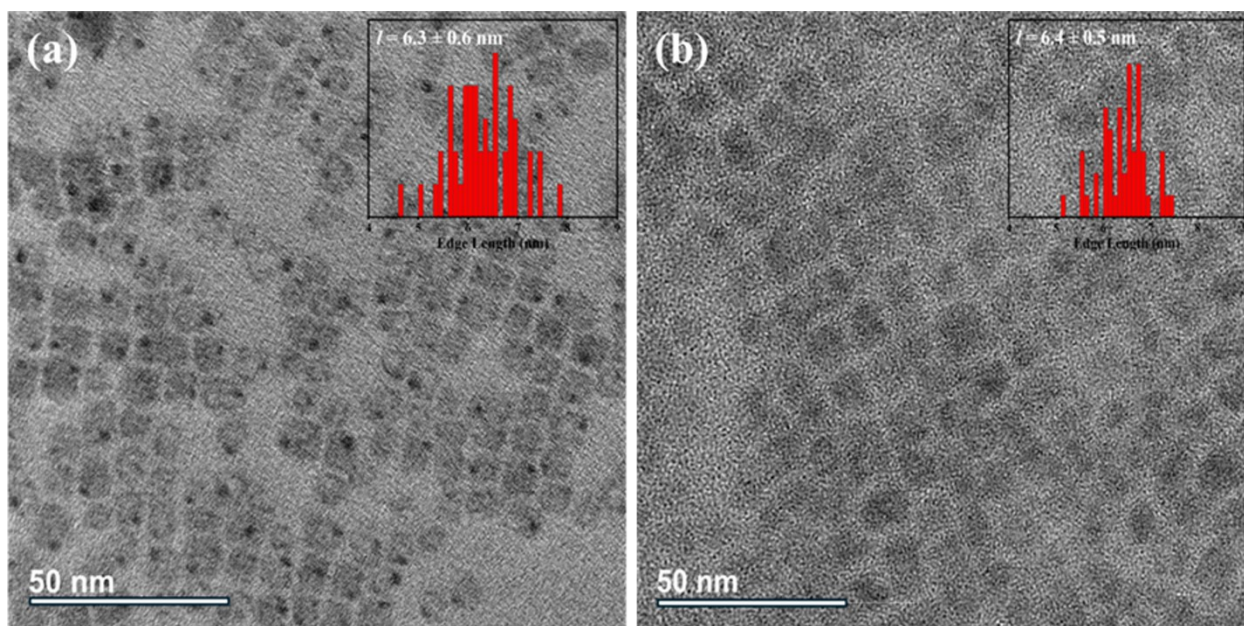

**Figure S1.** TEM images of (a) CsPbBr<sub>3</sub> NPs and (b) CsPbBr<sub>3</sub>/MnCl<sub>2</sub>YbCl<sub>3</sub> NPs are shown along with their size distributions (inset).

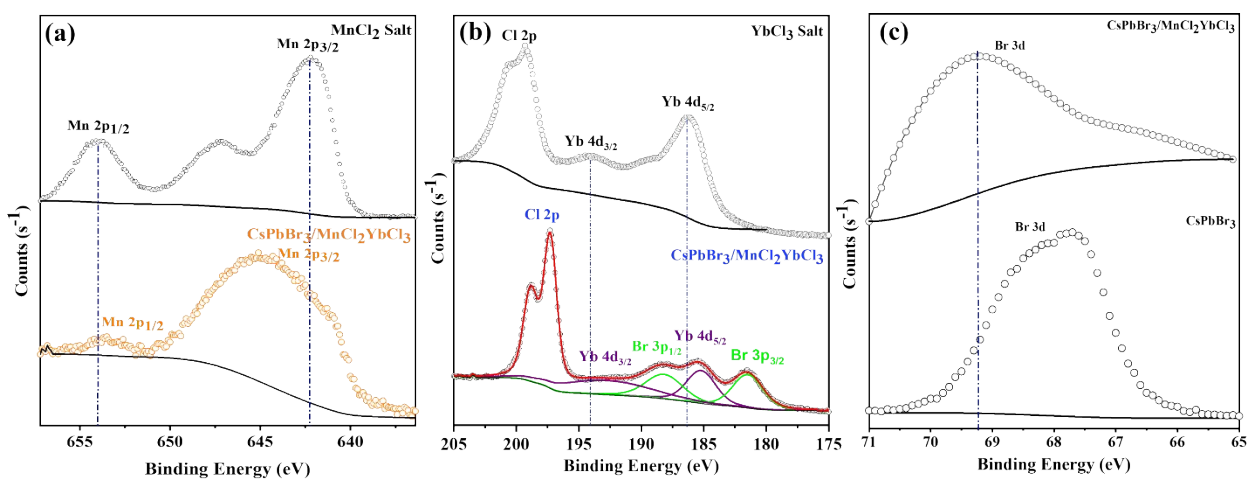

**Figure S2.** A comparison of the (a) Mn 2p XPS signatures between MnCl<sub>2</sub> salt (black circles) and CsPbBr<sub>3</sub>/MnCl<sub>2</sub>YbCl<sub>3</sub> NPs (orange circles), (b) Yb 4d XPS signatures between YbCl<sub>3</sub> salt (black circles) and CsPbBr<sub>3</sub>/MnCl<sub>2</sub>YbCl<sub>3</sub> NPs (fitted with purple solid line) and Br 3d XPS between CsPbBr<sub>3</sub> NPs and CsPbBr<sub>3</sub>/MnCl<sub>2</sub>YbCl<sub>3</sub> NPs are shown. The dotted lines in panels a-c indicate the shift in the binding energies between the different systems. The black solid lines denote the baseline. In panel b, the spectrum is shown in black circles and the envelope of the fit is shown in red solid line.

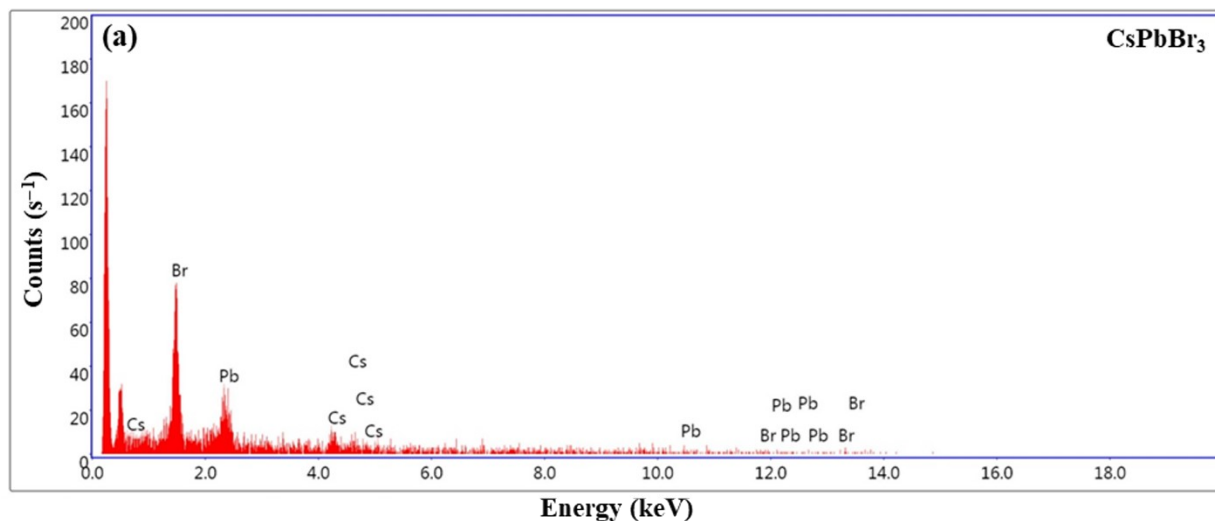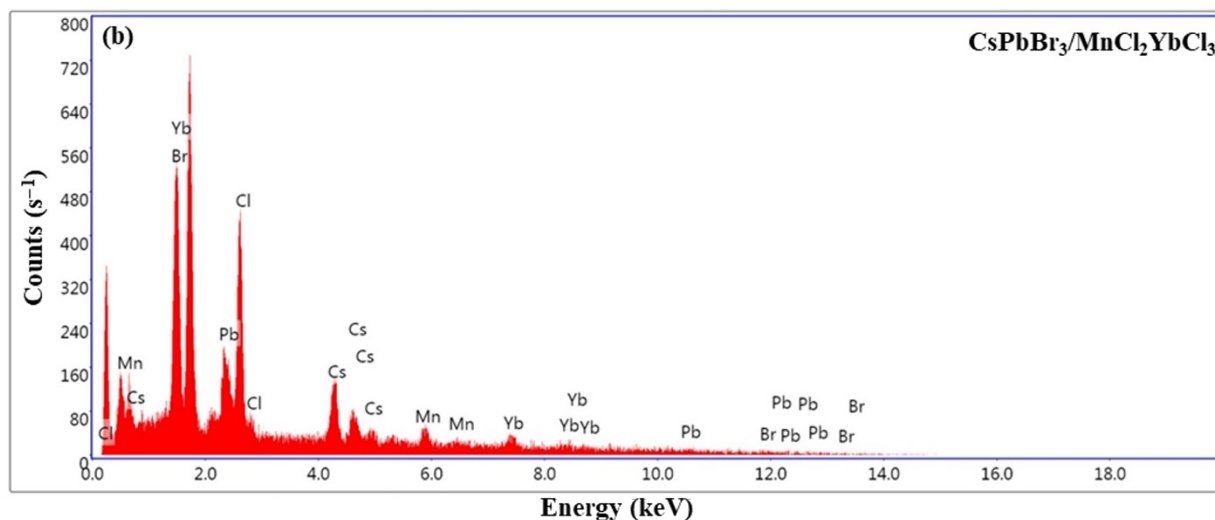

**Figure S3.** EDS signatures of (a) CsPbBr<sub>3</sub> NPs and (b) CsPbBr<sub>3</sub>/MnCl<sub>2</sub>YbCl<sub>3</sub> NPs are shown.

**Table S1.** Atomic percentages of the different elements are shown.

| System                                                   | Cs   | Pb   | Br   | Cl   | Mn  | Yb  |
|----------------------------------------------------------|------|------|------|------|-----|-----|
| CsPbBr <sub>3</sub>                                      | 17.7 | 18.9 | 63.4 | --   | --  | --  |
| CsPbBr <sub>3</sub> /MnCl <sub>2</sub> YbCl <sub>3</sub> | 16.7 | 5.5  | 5.7  | 53.3 | 9.3 | 9.5 |
| CsPbCl <sub>3</sub>                                      | 18.1 | 16.3 | --   | 65.6 |     |     |
| CsPbCl <sub>3</sub> /MnCl <sub>2</sub> YbCl <sub>3</sub> | 13.2 | 11.3 |      | 67.4 | 4.7 | 3.4 |
|                                                          | Cs   | Pb   | Br   | Cl   | Eu  | Tb  |
| CsPbCl <sub>3</sub> /EuCl <sub>3</sub> TbCl <sub>3</sub> | 15.2 | 6.3  | --   | 65.7 | 6.3 | 6.5 |

An error of ~10% is encountered while calculating the atomic percentage.

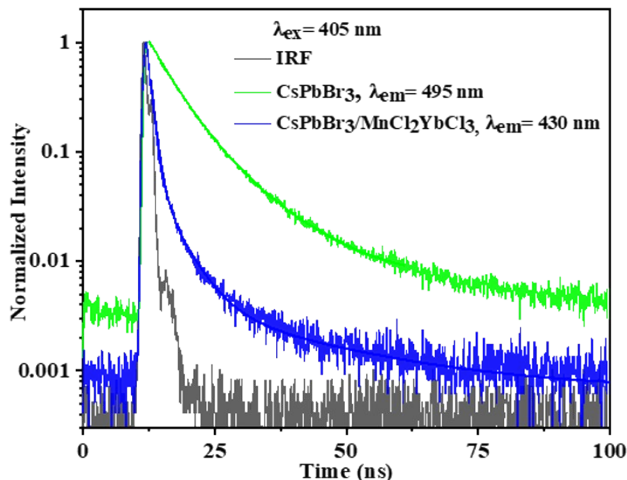

**Figure S4.** Emission decay profiles of CsPbBr<sub>3</sub> NPs (green) and CsPbBr<sub>3</sub>/MnCl<sub>2</sub>YbCl<sub>3</sub> NPs (blue) are shown. The NPs were dispersed in toluene for acquiring the spectra.

**Table S2.** Lifetime parameters of the different NPs.<sup>1</sup>

| System                                                                               | a <sub>1</sub> | τ <sub>1</sub> (ns) | a <sub>2</sub> | τ <sub>2</sub> (ns) | a <sub>3</sub> | τ <sub>3</sub> (ns) | <τ>(ns) |
|--------------------------------------------------------------------------------------|----------------|---------------------|----------------|---------------------|----------------|---------------------|---------|
| CsPbBr <sub>3</sub><br>λ <sub>em</sub> = 495 nm                                      | 0.65 ±         | 0.44 ±              | 0.32 ±         | 5.10 ±              | 0.03 ±         | 17.36               | 2.44 ±  |
|                                                                                      | 0.07           | 0.03                | 0.02           | 0.43                | 0.002          | ±1.50               | 0.22    |
| CsPbBr <sub>3</sub> /MnCl <sub>2</sub> YbCl <sub>3</sub><br>λ <sub>em</sub> = 430 nm | 0.93 ±         | 0.72 ±              | 0.06 ±         | 2.80 ±              | 0.01 ±         | 15.20 ±             | 0.98 ±  |
|                                                                                      | 0.08           | 0.12                | 0.01           | 0.10                | 0.001          | 2.20                | 0.20    |
| CsPbCl <sub>3</sub><br>λ <sub>em</sub> = 430 nm                                      | 0.95 ±         | 0.94 ±              | 0.04 ±         | 5.10 ±              | 0.01 ±         | 24.0 ±              | 1.33 ±  |
|                                                                                      | 0.01           | 0.04                | 0.007          | 0.42                | 0.002          | 4.4                 | 0.14    |
| CsPbCl <sub>3</sub> /MnCl <sub>2</sub> YbCl <sub>3</sub><br>λ <sub>em</sub> = 430 nm | 0.93 ±         | 0.96 ±              | 0.06 ±         | 5.10 ±              | 0.01 ±         | 30.36 ±             | 1.50 ±  |
|                                                                                      | 0.01           | 0.04                | 0.005          | 0.60                | 0.001          | 0.40                | 0.16    |

<sup>1</sup>The decays are fitted to a multiexponential model using the equation  $I(t) = \sum a_i \exp(-t/\tau_i)$ , where  $\sum a_i = 1$  and  $\langle \tau \rangle = a_1\tau_1 + a_2\tau_2 + a_3\tau_3$  with  $\tau_1$ ,  $\tau_2$ , and  $\tau_3$  being the three lifetime components having relative amplitudes  $a_1$ ,  $a_2$ , and  $a_3$  respectively.  $\chi^2 \leq 1.2$

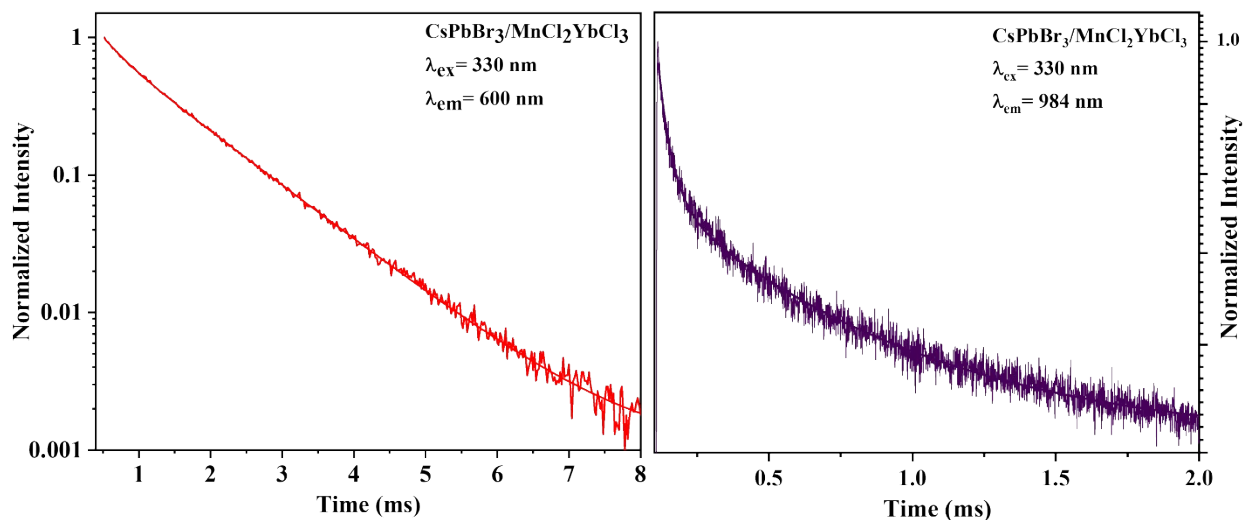

**Figure S5.**  $\text{Mn}^{2+}$  (left) and  $\text{Yb}^{3+}$  (right) emission decay profiles in  $\text{CsPbBr}_3/\text{MnCl}_2\text{YbCl}_3$  NPs are shown. The NPs were dispersed in toluene for acquiring the spectrum.

**Table S3.**  $\text{Mn}^{2+}$  and  $\text{Yb}^{3+}$  lifetime parameters of the different NPs.<sup>1</sup>

| System                                                                                 | $a_1$           | $\tau_1(\text{ms})$ | $a_2$           | $\tau_2(\text{ms})$ | $\langle\tau\rangle(\text{ms})$ |
|----------------------------------------------------------------------------------------|-----------------|---------------------|-----------------|---------------------|---------------------------------|
| $\text{CsPbBr}_3/\text{MnCl}_2\text{YbCl}_3$<br>$\lambda_{\text{em}} = 600 \text{ nm}$ | $0.20 \pm 0.01$ | $0.30 \pm 0.01$     | $0.80 \pm 0.01$ | $1.10 \pm 0.10$     | $0.94 \pm 0.08$                 |
| $\text{CsPbBr}_3/\text{MnCl}_2\text{YbCl}_3$<br>$\lambda_{\text{em}} = 984 \text{ nm}$ | $0.43 \pm 0.04$ | $0.047 \pm 0.005$   | $0.57 \pm 0.06$ | $0.82 \pm 0.07$     | $0.49 \pm 0.05$                 |
| $\text{CsPbCl}_3/\text{MnCl}_2\text{YbCl}_3$<br>$\lambda_{\text{em}} = 600 \text{ nm}$ | $0.28 \pm 0.02$ | $0.21 \pm 0.01$     | $0.72 \pm 0.06$ | $1.2 \pm 0.10$      | $0.92 \pm 0.09$                 |
| $\text{CsPbCl}_3/\text{MnCl}_2\text{YbCl}_3$<br>$\lambda_{\text{em}} = 984 \text{ nm}$ | $0.30 \pm 0.02$ | $0.07 \pm 0.006$    | $0.70 \pm 0.05$ | $0.94 \pm 0.80$     | $0.68 \pm 0.06$                 |

<sup>1</sup>The decays are fitted to a multiexponential model using the equation  $I(t) = \sum a_i \exp(-t/\tau_i)$ , where  $\sum a_i = 1$  and  $\langle\tau\rangle = a_1\tau_1 + a_2\tau_2$  with  $\tau_1$  and  $\tau_2$  being the two lifetime components having relative amplitudes  $a_1$  and  $a_2$  respectively.  $\chi^2 \leq 1.3$

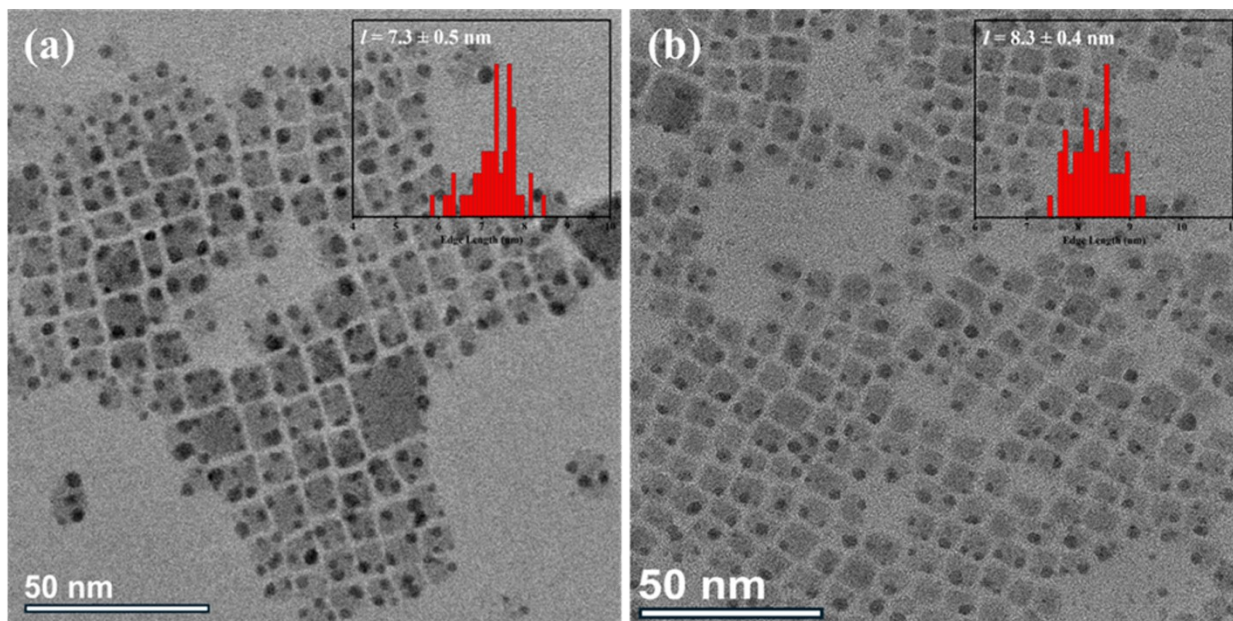

**Figure S6.** TEM images of (a)  $\text{CsPbCl}_3$  NPs and (b)  $\text{CsPbCl}_3/\text{MnCl}_2\text{YbCl}_3$  NPs are shown along with their size distributions (inset).

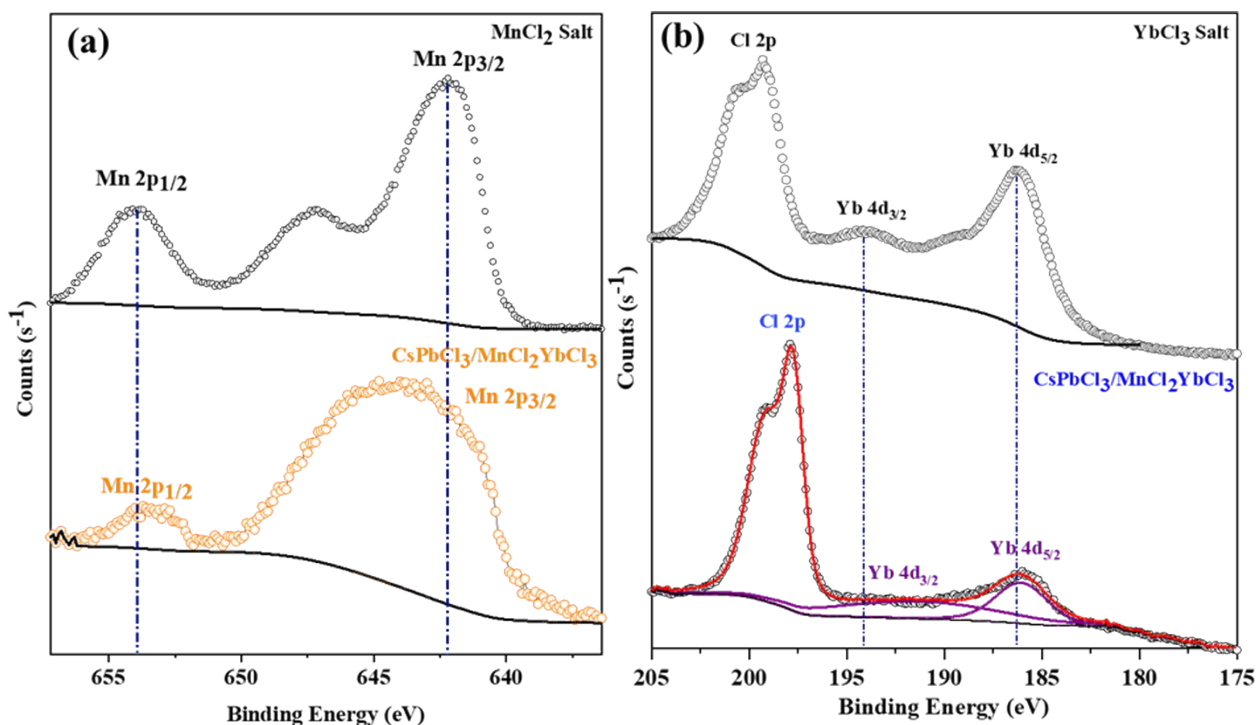

**Figure S7.** A comparison of the (a) Mn 2p XPS signatures between  $\text{MnCl}_2$  salt (black circles) and  $\text{CsPbCl}_3/\text{MnCl}_2\text{YbCl}_3$  NPs (orange circles) and (b) Yb 4d XPS signatures between  $\text{YbCl}_3$  salt (black circles) and  $\text{CsPbCl}_3/\text{MnCl}_2\text{YbCl}_3$  NPs (fitted with purple solid line) are shown. The dotted lines in panels a-b indicate the shift in the binding energies between the precursors and the NPs. The black solid lines denote the baseline. In panel b, the spectrum is shown in black circles and the envelope of the fit is shown in red solid line.

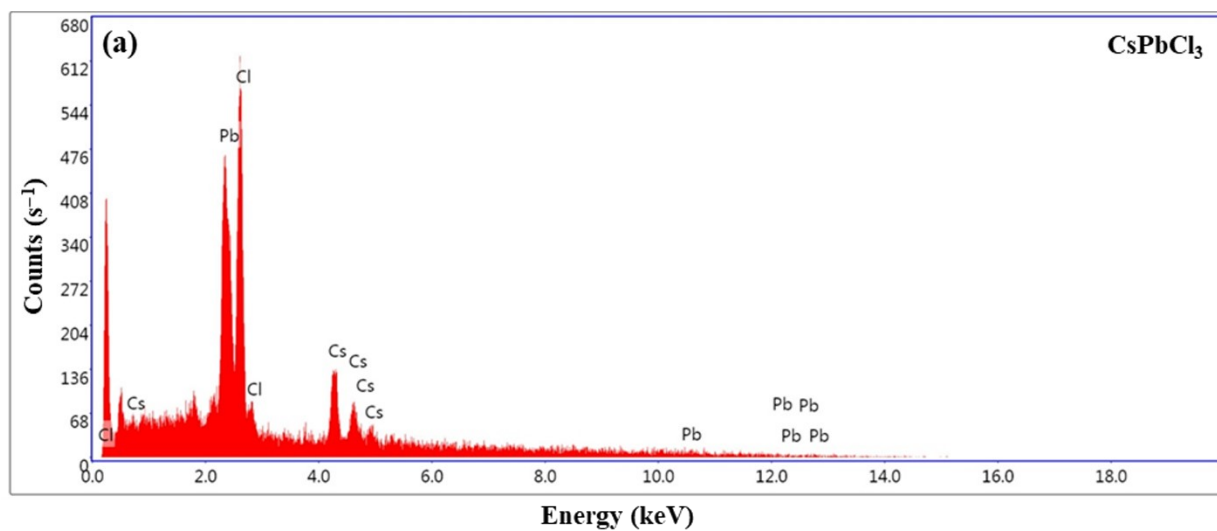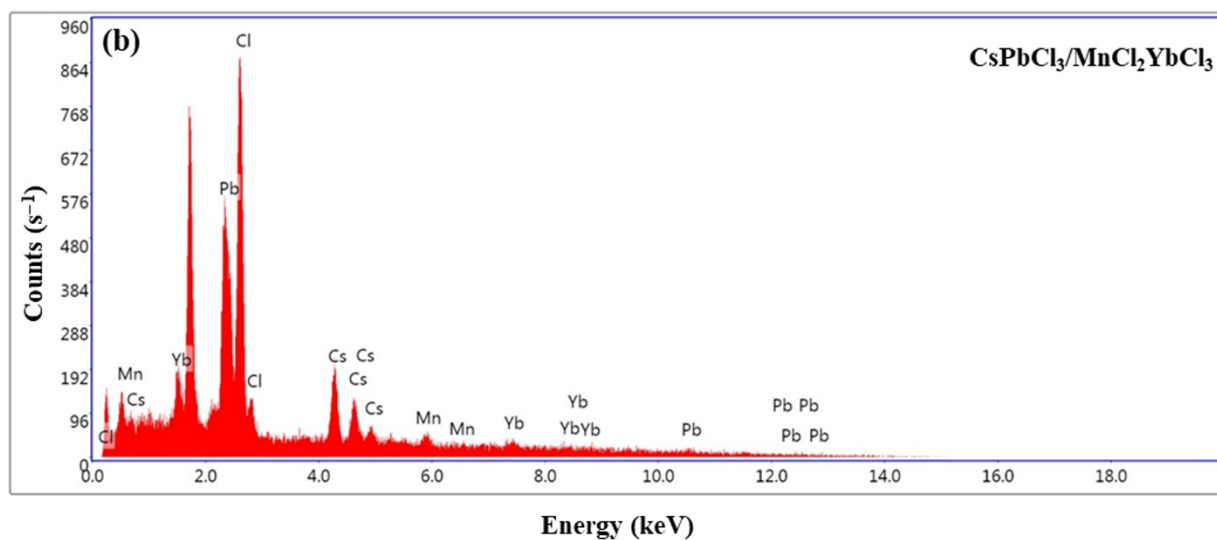

**Figure S8.** EDS signatures of (a)  $\text{CsPbCl}_3$  NPs and (b)  $\text{CsPbCl}_3/\text{MnCl}_2\text{YbCl}_3$  NPs are shown.



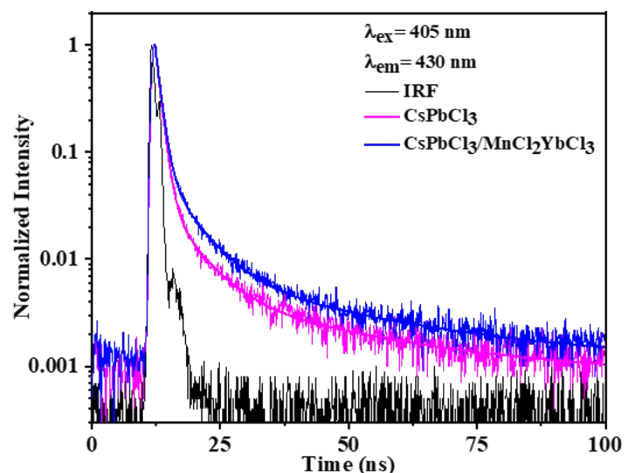

**Figure S9.** Emission decay profiles of CsPbCl<sub>3</sub> NPs (magenta) and CsPbCl<sub>3</sub>/MnCl<sub>2</sub>YbCl<sub>3</sub> NPs (blue) are shown. The NPs were dispersed in toluene for acquiring the spectra.

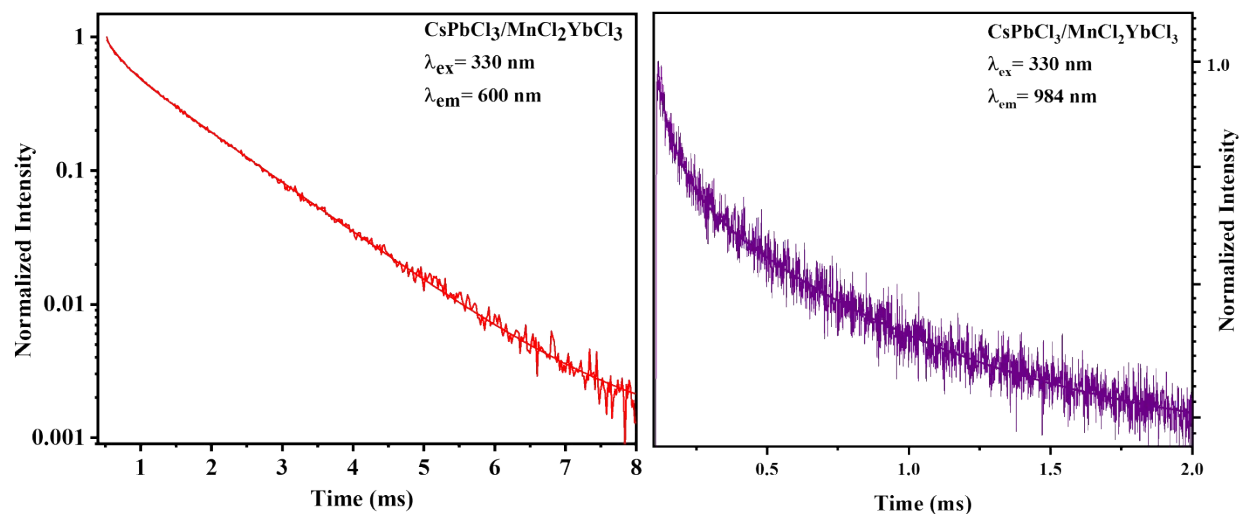

**Figure S10.** Mn<sup>2+</sup> (left) and Yb<sup>3+</sup> (right) emission decay profile in CsPbCl<sub>3</sub>/MnCl<sub>2</sub>YbCl<sub>3</sub> NPs are shown. The NPs were dispersed in toluene for acquiring the spectrum.

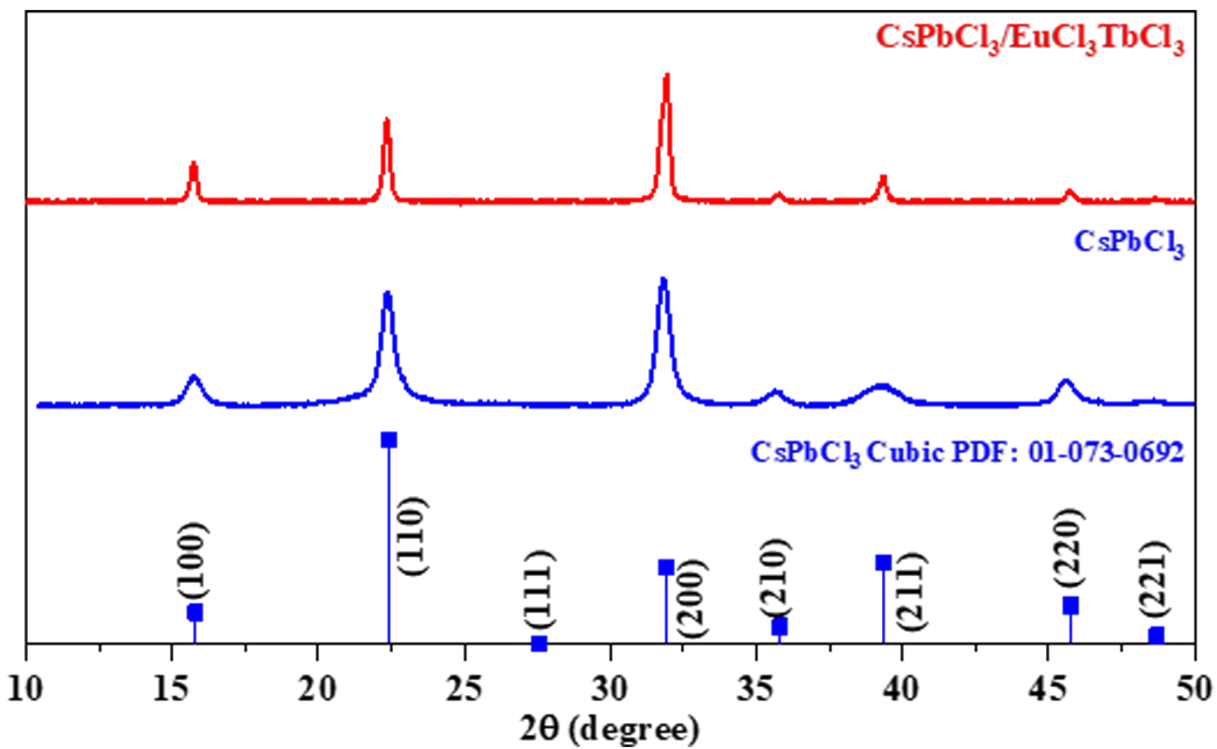

**Figure S11.** XRD patterns of the CsPbCl<sub>3</sub> and the CsPbCl<sub>3</sub>/EuCl<sub>3</sub>TbCl<sub>3</sub> NPs are shown.

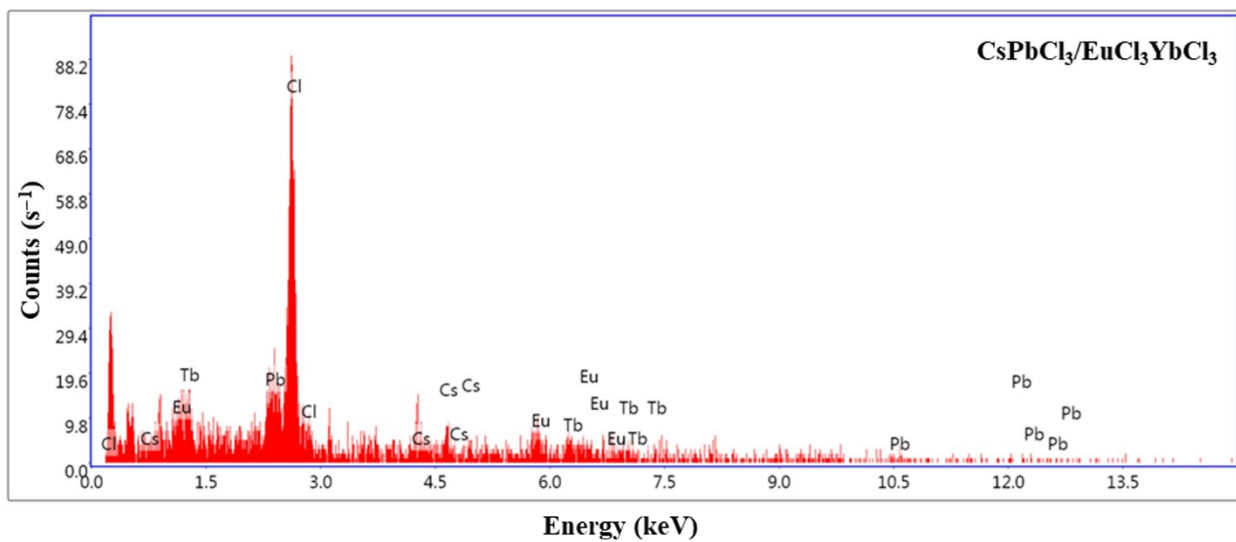

**Figure S12.** EDS signature of CsPbCl<sub>3</sub>/EuCl<sub>3</sub>TbCl<sub>3</sub> NPs is shown.

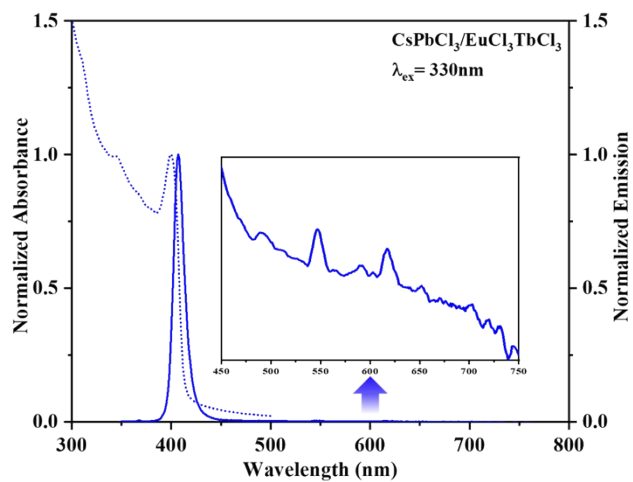

**Figure S13.** UV-vis absorption and steady-state emission spectra of CsPbCl<sub>3</sub>/EuCl<sub>3</sub>TbCl<sub>3</sub> NPs are shown.

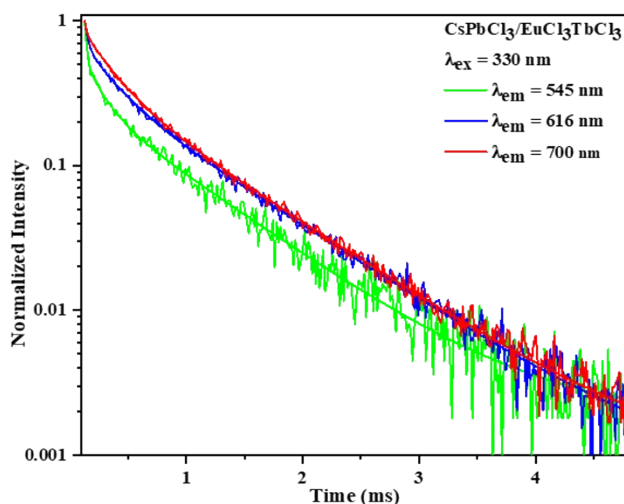

**Figure S14.** Eu<sup>3+</sup> and Tb<sup>3+</sup> decay profiles in EuCl<sub>3</sub>TbCl<sub>3</sub> NPs are shown.

**Table S4.** Ln<sup>3+</sup> (Ln = Eu, Tb) lifetime parameters of the different NPs.<sup>1</sup>

| System                                                                               | a <sub>1</sub> | τ <sub>1</sub> (ms) | a <sub>2</sub> | τ <sub>2</sub> (ms) | a <sub>3</sub> | τ <sub>3</sub> (ms) | <τ>(ms)        |
|--------------------------------------------------------------------------------------|----------------|---------------------|----------------|---------------------|----------------|---------------------|----------------|
| CsPbCl <sub>3</sub> /EuCl <sub>3</sub> TbCl <sub>3</sub><br>λ <sub>em</sub> = 545 nm | 0.68 ±<br>0.04 | 0.03 ±<br>0.007     | 0.17 ±<br>0.01 | 0.19 ±<br>0.04      | 0.15 ±<br>0.02 | 0.83 ±<br>0.08      | 0.18 ±<br>0.04 |
| CsPbCl <sub>3</sub> /EuCl <sub>3</sub> TbCl <sub>3</sub><br>λ <sub>em</sub> = 616 nm | 0.49 ±<br>0.04 | 0.03 ±<br>0.004     | 0.25 ±<br>0.03 | 0.20 ±<br>0.03      | 0.26 ±<br>0.03 | 0.80 ±<br>0.09      | 0.26 ±<br>0.05 |
| CsPbCl <sub>3</sub> /EuCl <sub>3</sub> TbCl <sub>3</sub><br>λ <sub>em</sub> = 700 nm | 0.44 ±<br>0.05 | 0.02 ±<br>0.003     | 0.33 ±<br>0.03 | 0.23 ±<br>0.02      | 0.23 ±<br>0.02 | 0.80 ±<br>0.07      | 0.27 ±<br>0.04 |

<sup>1</sup>The decays are fitted to a multiexponential model using the equation  $I(t) = \sum a_i \exp(-t/\tau_i)$ , where  $\sum a_i = 1$  and  $\langle \tau \rangle = a_1\tau_1 + a_2\tau_2 + a_3\tau_3$  with  $\tau_1$ ,  $\tau_2$ , and  $\tau_3$  being the three lifetime components having relative amplitudes  $a_1$ ,  $a_2$ , and  $a_3$  respectively.  $\chi^2 \leq 1.3$

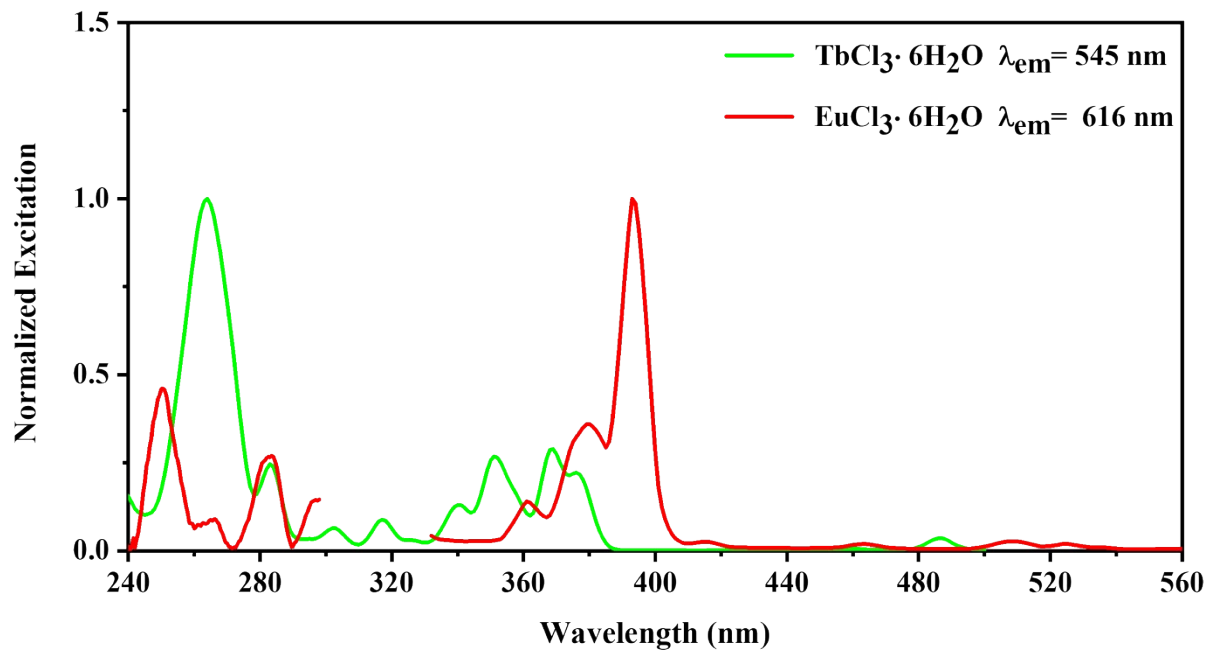

**Figure S15.** Excitation spectra of the  $\text{LnCl}_3 \cdot 6\text{H}_2\text{O}$  [ $\text{Ln} = \text{Eu}, \text{Tb}$ ] in water is shown. For  $\text{EuCl}_3 \cdot 6\text{H}_2\text{O}$ , the spectrum from 300-330 nm is broken to remove the contribution of the harmonic from the excitation source.
